# Supplementary material for: The Use of Molecular Markers to Investigate Possible Resistance to Heartworm Preventives in Dirofilaria Immitis Samples from Heartworm Positive Dogs in Europe
Source: Research Square preprint supplement (doi:10.21203/rs.3.rs-864621/v1), 2021-09-14
Supplement: Supplementary file 1 [file 11f01618f20b2b6ffe7fc147.docx]

Table S1 SNP ID position and primer sequences [11]

| ID | Scaffold | Position | Primer Name & Sequence |
| --- | --- | --- | --- |
| SNP 1 | nDi.2.2.scaf00001 | 466197 | scaf00001-466197-CS1F ACACTGACGACATGGTTCTACATTCTATCGAAAACCTTCCAG |
| scaf00001-466197-CS2R TACGGTAGCAGAGACTTGGTCTAGGTTGCAAAAGTTGCAATG |
|  |  |  |  |
| SNP 2 | nDi.2.2.scaf00004 | 79766 | scaf00004-79766-CS1F ACACTGACGACATGGTTCTACACGTGACTAAAAGAATAGTG |
| scaf00004-79766-CS2R TACGGTAGCAGAGACTTGGTCTCAATTTAGGGATATGACACAG |
|  |  |  |  |
| SNP 3 | nDi.2.2.scaf00005 | 662854 | scaf00005-662854-CS1F ACACTGACGACATGGTTCTACAGTTATTTGCACTACTCTCCC |
| scaf00005-662854-CS2R TACGGTAGCAGAGACTTGGTCTTGGCGTACTGATCACATTGG |
|  |  |  |  |
| SNP 4 | nDi.2.2.scaf00046 | 22857 | scaf00046-22857-CS1F ACACTGACGACATGGTTCTACACGAGGTAAAGCACACAGAAG |
| scaf00046-22857-CS2R TACGGTAGCAGAGACTTGGTCTCAACAAAATGCCGCAGATGG |
|  |  |  |  |
| SNP 5 | nDi.2.2.scaf00046 | 76278 | scaf00046-76278-CS1F ACACTGACGACATGGTTCTACAGGCCAATAAATAAAGGCTA |
| scaf00046-76278-CS2R TACGGTAGCAGAGACTTGGTCTGTTTTCTGGAATTATCAGAC |
|  |  |  |  |
| SNP 6 | nDi.2.2.scaf00046 | 222254 | scaf00046-222254-CS1F ACACTGACGACATGGTTCTACACATCGTTGTCAACTTCCTGC |
| scaf00046-222254-CS2R TACGGTAGCAGAGACTTGGTCTGAAATTTGAAAATGGGTACT |
|  |  |  |  |
| SNP 7 | nDi.2.2.scaf00140 | 30919 | scaf00140-30919-CS1F ACACTGACGACATGGTTCTACACGAAGAAGAAACTTTTCGGG |
| scaf00140-30919-CS2R TACGGTAGCAGAGACTTGGTCTGTACAATTAATTGCTGTTCGC |
|  |  |  |  |
| SNP 8 | nDi.2.2.scaf00185 | 10639 | scaf00185-10639-CS1F ACACTGACGACATGGTTCTACAACGCAGGAAAGCTTTAATGG |
| scaf00185-10639-CS2R TACGGTAGCAGAGACTTGGTCTATCATCATTTTATCAATTCC |
|  |  |  |  |
| SNP 9 | nDi.2.2.scaf00185 | 62174 | scaf00185-62174-CS1F ACACTGACGACATGGTTCTACATCGATCATTTAGTAACAACG |
| scaf00185-62174-CS2R TACGGTAGCAGAGACTTGGTCTTTGCGTTACAGCGCCAAATC |
